# Supplementary material for: Nitrogen-doped carbon nanosheets for high-performance liquid as well as solid state supercapacitor cells
Source: Royal Society of Chemistry journal article supplement (doi:10.1039/c6ra00068a), 2016-01-01
Supplement: c6ra00068a1.pdf [file c6ra00068a1.pdf]

Electronic Supplementary Information for  
**Nitrogen-Doped Carbon Nanosheets for High Performance Liquid as well as Solid State Supercapacitor cell**

Vikrant Sahu, Sonia Grover, Gurmeet Singh and Raj Kishore Sharma\*

*Department of Chemistry, Delhi University, Delhi-110007, INDIA*

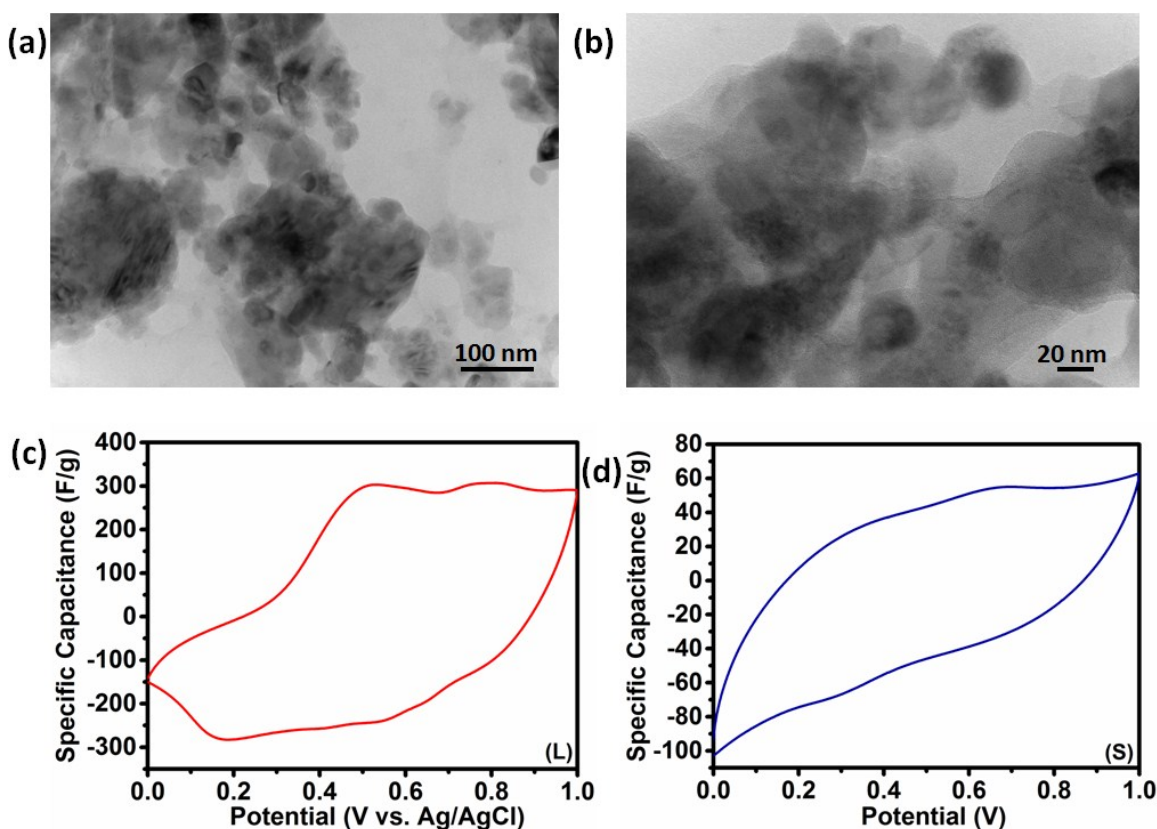

**Fig. S1.** (a, b) HRTEM micrograph of polyaniline (PANI) samples synthesized without CTAB, and their cyclic voltammograms recorded in 3 cell assembly using 1M H<sub>2</sub>SO<sub>4</sub> (“L”-aqueous electrolyte) (c), and PVA/ H<sub>2</sub>SO<sub>4</sub> (two cell assembly, “S” solid electrolyte).

No defined morphology is obtained when PANI is synthesised without CTAB (Fig. S1). A comparative charge storage characteristics in 3 cell assembly using CV, suggest that the PANI synthesised without CTAB can store about 197 F/g in 1.0 M H<sub>2</sub>SO<sub>4</sub> whereas in solid state cell using PVA/H<sub>2</sub>SO<sub>4</sub> this could store 45.5 F/g. It clearly shows that PANI synthesised with the aid of CTAB shows improved performance in both solid and liquid electrolytes due to ordered structures/morphology.
